# Supplementary material
Source: PubMed Central journal article supplement (PMC3003030)
Supplement: 1016390107_pnas.201016390SI.pdf [file 1016390107_pnas.201016390SI.pdf]

# Supporting Information

Ko et al. 10.1073/pnas.1016390107

## SI Materials and Methods

**Antibodies.** Primary antibodies used were: anti-GAPDH (*Proteus* Biosciences), anti-tubulin (Sigma), anti-dynamin (BD), anti-AP-2 (ABR), anti-Hip1R (Chemicon), polyclonal anti-epsin 1 (1), monoclonal anti-epsin 1 (from our laboratory), anti-epsin 2 (2), anti-ezrin (Upstate), anti-clathrin TD1 (ATCC), anti-clathrin 4045 (Chemicon), and monoclonal anti-HA tag (Covance). The following antibodies were kind gifts: anti-EHD1 and EHD2 (from Bettina Winckler, University of Virginia, Charlottesville, VA, and Steve Caplan, University of Nebraska Medical Center, Omaha, NE, respectively); anti-H/K ATPase (HK9) (from Michael Caplan, Yale University, New Haven, CT); and anti-H/K ATPase (12.18) (from James Goldenring, Vanderbilt University, Nashville, TN). Secondary antibodies and protein A: HRP-conjugated antibodies for Western blotting (Biorad), Alexa Fluor-conjugated antibodies for immunofluorescence (Invitrogen), and 5- or 10-nm protein A gold for electron microscopy (Utrecht-UMC).

**Immunogold Labeling for Electron Microscopy.** Immunogold labeling of ultrathin frozen sections for electron microscopic analysis was carried out by standard procedures, according to: <http://medicine.yale.edu/cellbio/ccmi/em/protocols/index.aspx>.

Reagents used for single labeling were: rabbit polyclonal anti-clathrin antibodies, rabbit polyclonal anti-epsin 3 antibodies, rabbit polyclonal anti-H/K ATPase antibodies. Secondary reagent was 10-nm protein A gold.

Reagents and steps (in sequence) used for double labeling were as follows: (i) mouse monoclonal anti-epsin 1 antibodies; (ii) rabbit anti-mouse IgGs (JacksonImmuno); (iii) 5-nm protein A gold; (iv) rabbit polyclonal anti-epsin 3 antibodies; (v) 10-nm protein A gold. Samples were viewed on FEI Tencai Biotwin TEM at 80 Kv. Images were taken using a Morada CCD camera fitted with iTEM (Olympus) software. For electron microscopy morphometry, a total

of 293 gold particles from 30 micrographs were counted and classified into one of the four groups listed in Fig. S1.

**Plasmids.** To generate GST-EHD1 and GST-EHD2 (EH domains) plasmids, amino acid sequences 439 to 535 and 444 to 544 of mouse EHD1 and EHD2, respectively, were amplified from GFP-tagged EHD plasmids using EcoRI/XhoI (for EHD1) and BamHI/XhoI (for EHD2) restriction sites, and then subcloned into the pGEX-6P-1 vector.

**Analysis of Human Tissues.** Immunohistochemistry tissue microarray analysis (IHC-TMA) was designed and prepared as described (3, 4). Formalin-fixed, paraffin-embedded gastric tissue blocks of primary tumors, paired lymph node, and normal tissue were from the same group of patients described in Vecchi et al. (4). Tissue section arrays, which comprised two representative cores of all samples, were processed by immunoperoxidase staining using anti-epsin 3 monoclonal antibodies followed by detection with the EnVision Plus/HRP detection system (DAKO). Based on visual inspection of the intensity of the immunoreactive signal, tissues were classified in two groups: one with negative or low-moderate reactivity and one with a high level of reactivity similar to that of normal parietal cells. Statistical analyses of IHC-TMA results were performed using JMP IN 5.1 software (SAS).

Epsin 3 Affymetrix Microarray analysis was performed on our previously published data set of gastric tumors (4). Data were normalized using the MAS5.0 and processed in GeneSpring 7.3 (Agilent). The fold-change of epsin 3 expression in each tissue sample is relative to the ratio of the average signal of the two Affymetrix EPN3 probesets divided by their median across the entire dataset. Scatter plots were generated using Prism software (GraphPad Software, Inc.) and *P* values calculated by the two-tailed Welch's *t* test on a log<sub>2</sub> expression ratio.

1. Chen H, et al. (1998) Epsin is an EH-domain-binding protein implicated in clathrin-mediated endocytosis. *Nature* 394:793–797.
2. Rosenthal JA, et al. (1999) The epsins define a family of proteins that interact with components of the clathrin coat and contain a new protein module. *J Biol Chem* 274: 33959–33965.

3. Kononen J, et al. (1998) Tissue microarrays for high-throughput molecular profiling of tumor specimens. *Nat Med* 4:844–847.
4. Vecchi M, et al. (2007) Gene expression analysis of early and advanced gastric cancers. *Oncogene* 26:4284–4294.
